# Supplementary material for: Multi-GNSS real-time tropospheric delay retrieval based on SSR products from different analysis centers
Source: Copernicus journal article supplement (doi:10.5194/angeo-2024-8), 2024-07-16
Supplement: Supplementary file [file angeo-2024-8-AC1-supplement.pdf]

## Response to Reviewer Comments

**General Comments:** In this study, the accuracies of GPS, Galileo, and BDS3 real-time satellite orbit and clock error products from four Analysis Centers (ACs) were evaluated and the real-time positioning performance and Zenith Tropospheric Delay (ZTD) accuracies for GPS, Galileo, and BDS3 were analyzed. This study is essential for selecting precise SSR products from different ACs for real-time ZTD retrieval. While the paper is generally well-written, there are still some issues that need clarification or modification to enhance its quality. Once follow issues are addressed, the manuscript can be accepted.

**Response:** Thanks to the reviewer for the encouraging comments. We have made a point-by-point response to each of the reviewer's comments in the following section.

---

### Point 1:

- In this study, only IGMAS stations were used for ZTD accuracy and usability evaluation. Why weren't IGS stations used for verifying ZTD accuracy and usability?

### Response 1:

- ✓ Thank you for the reviewer's question. IGMAS is an open technology platform for the collection, storage, analysis, and management of observation data. However, it lacks effective verification when it comes to analyzing the impact of different SSR products on the accuracy of real-time PPP-ZTD. To conduct a comprehensive analysis and study of this issue, we chose to use IGMAS for verification.

---

### Point 2:

- Page 3, Line 29: "verifying the performance of PPP, assessing different SSR products, and verifying the performance of RT-PPP using the results obtained by post-processing PPP and PRIDE PPPAR." It seems that PRIDE PPPAR is used in this research; however, it is not mentioned in Section II. Please include a description of PRIDE PPPAR in that section.

### Response 2:

- ✓ Thanks for the reviewer's suggestion. We have added an explanation of the PRIDE PPPAR. Please see in P3L33-P4L1.

---

### Point 3:

- The accuracies of RT satellite orbit and clock error products from four ACs were evaluated. Why were data from only four analysis centers used?

### Response 3:

- ✓ Thank you for the reviewer's question. Due to the incomplete real-time data from other analysis centers during the DOY 355 in 2023 to DOY 14 in 2024, real-time data from four analysis centers are used in this study. We have added corresponding description to the manuscript. Please see in P8L8-9.
- 

**Point 4:**

- Page 16, Fig. 10: In the figure, besides the missing data at the XIA station mentioned in the paper, there are also some "breakpoints." Please explain the occurrence of these "breakpoints."

**Response 4:**

- ✓ Thank you for the reviewer's suggestion. The "breakpoints" in Figure 10 are caused by occasional disconnections between the local network and the mount-point, which result in data loss. We have added an explanation for the "breakpoints." Please refer to P15L20-22.
- 

**Point 5:**

- Page 5, Fig. 2. The meaning of "IGS" and "IGS Stations for PPP validation" in the legend is unclear. Please clarify their definitions.

**Response 5:**

- ✓ Thank you for the reviewer's reminder. "IGS" refers to all IGS stations in China and the surrounding areas, while "IGS Stations for PPP validation" refers to the specific IGS stations selected for this study. We have added an explanation of "IGS" and "IGS Stations for PPP validation" in the legend. Please refer to P4L12-14.
- 

**Point 6:**

- Page 5, Equation (1). The does not seem to be defined. Please add the descriptions about the .

**Response 6:**

- ✓ Thanks for the reviewer's reminding. We added the explanation of  $t_0$ . Please see in P5L5.
- 

**Point 7:**

- Page 14, Tab. 8. Table provides a detailed breakdown of convergence time statistics for four ACs. It's recommended to add the mean values for different ACs to make the statistical result clearer.

**Response 7:**

- ✓ Thanks for the reviewer's reminding. We added the average convergence time for all sites for different analysis centers in Table 8. Please see in P14T8.

---

**Point 8:**

- Page 17, Line 8: “The differences distribution of RT-PPP-derived ZTDs based on the other ACs were also counted, and the bias was nearly 0 mm”. It’s recommended to add more descriptions (such as figures) for other ACs to make the error distribution of different analysis centers more intuitive.

**Response 8:**

- ✓ Thanks for the reviewer’s reminding. We have added error distribution for different analysis centers to the manuscript and added corresponding descriptions. Please see in P18F12.

---

**Point 9:**

- Page 18, Fig. 12. The “\*” that appears in the graph seems to indicate that station lacked observation data, but there is no explanation for the “\*” in the Fig .12. Please add an explanation of the “\*” to the Fig. 12.

**Response 9:**

- ✓ Thanks for the reviewer’s reminding. We have revised Figure 12 and added an explanation for "\*". Please see in P19F13.

---

**Point 10:**

- Page 18, Line 9: “Figure 12. The availability of RT-PPP-derived ZTDs from WHU SSR products at seven IGMAS stations/mm”. The unit of the gravity acceleration should be “%”.

**Response 10:**

- ✓ Thanks for the reviewer’s reminding. We have revised "mm" to "%". Please see in P19L17.
- ✓ In addition, We inspected the manuscript and revised all the similar errors in the whole manuscript.
